# Supplementary material
Source: publisher figshare collection journal article supplement (https://sage.figshare.com/ndownloader/files/23882349)
Supplement: Supplementary file 1 [file 23882349]

**Appendix 1** Logistic regression of temporomandibular joint symptoms by success of orthodontic treatment, adjusting for sex, personality characteristics and parafunctional habits.

|                                                             | Self-reported click at age 45 (last 12 months)<br>OR (95% CI) | Self-reported click during age 45 examination<br>OR (95% CI) | Examiner-detected click during age 45 examination<br>OR (95% CI) | Disc displacement with reduction (DC/TMD) at age 45<br>OR (95% CI) |
|-------------------------------------------------------------|---------------------------------------------------------------|--------------------------------------------------------------|------------------------------------------------------------------|--------------------------------------------------------------------|
| Female sex                                                  | 0.9 (0.6, 1.3)                                                | <b>1.6 (1.1, 2.3)</b>                                        | <b>1.8 (1.3, 2.7)</b>                                            | <b>1.7 (1.2, 2.6)</b>                                              |
| MPQ superfactors                                            |                                                               |                                                              |                                                                  |                                                                    |
| Negative emotionality Z score                               | 1.1 (0.9, 1.4)                                                | 1.1 (1.0, 1.4)                                               | 1.0 (0.9, 1.2)                                                   | 1.1 (0.9, 1.3)                                                     |
| Positive emotionality Z score                               | <b>0.8 (0.6, 0.9)</b>                                         | 1.0 (0.8, 1.2)                                               | 1.0 (0.9, 1.2)                                                   | 1.1 (0.9, 1.3)                                                     |
| Constraint Z score                                          | 1.0 (0.8, 1.2)                                                | 0.9 (0.8, 1.1)                                               | 0.9 (0.9, 1.2)                                                   | 0.9 (0.7, 1.1)                                                     |
| Outcome of orthodontic treatment                            |                                                               |                                                              |                                                                  |                                                                    |
| Satisfactory*                                               | 1.2 (0.7, 2.0)                                                | 0.8 (0.5, 1.3)                                               | 0.8 (0.5, 1.4)                                                   | 1.0 (0.6, 1.6)                                                     |
| Unsatisfactory**                                            | 1.0 (0.6, 0.9)                                                | 0.8 (0.5, 1.2)                                               | 0.9 (0.6, 1.4)                                                   | 0.8 (0.5, 1.3)                                                     |
| Self-reported day-time dental clenching, last 12 months     | <b>2.6 (1.6, 4.3)</b>                                         | 1.2 (0.7, 1.9)                                               | 0.8 (0.5, 1.3)                                                   | 1.0 (0.6, 1.7)                                                     |
| Self-reported night-time clenching/grinding, last 12 months | 1.2 (0.7, 2.0)                                                | 1.1 (0.7, 1.7)                                               | 1.1 (0.7, 1.8)                                                   | 1.1 (0.6, 1.8)                                                     |

\*Participant received orthodontic treatment and had normal OJ, OB and posterior cross bite at age 45.

\*\* Participant received orthodontic treatment but had abnormal OJ, OB and posterior cross bite at age 45.
